# Supplementary material for: A robust and versatile host–guest peptide toolbox for developing highly stable and specific quantum dot-based peptide probes for imaging extracellular matrices and cells
Source: Royal Society of Chemistry journal article supplement (doi:10.1039/d3tb02749j), 2023-12-19
Supplement: d3tb02749j1.pdf [file d3tb02749j1.pdf]

## Supporting Information

### Robust and Versatile Host-Guest Peptide Toolbox for Developing Highly Stable and Specific Quantum Dots-Based Peptide Probes for Imaging Extracellular Matrix and Cells

*Xiangdong Cai<sup>1,2</sup>, Bo Wang<sup>1</sup>, Linge Nian<sup>1</sup>, Sha Zhao<sup>1</sup>, and Jianxi Xiao<sup>1</sup>*

1. State Key Laboratory of Applied Organic Chemistry, College of Chemistry and Chemical Engineering, Lanzhou University, Lanzhou, 730000, P. R. China

2. School of Life Sciences, Lanzhou University, Lanzhou, 730000, P. R. China

E-mail: [xiaojx@lzu.edu.cn](mailto:xiaojx@lzu.edu.cn).

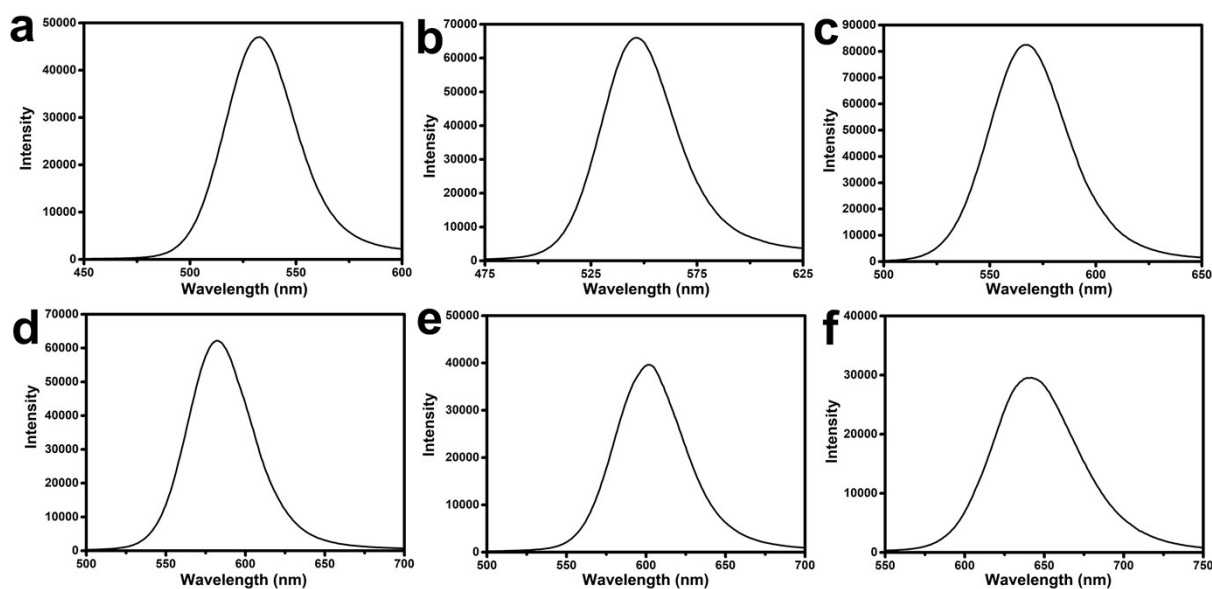

**Fig. S1.** Fluorescence spectra of H1G1-QDs with maximum emission wavelengths of 530 nm (a), 545 nm (b), 565 nm (c), 585 nm (d), 605 nm (e) and 640 nm (f).

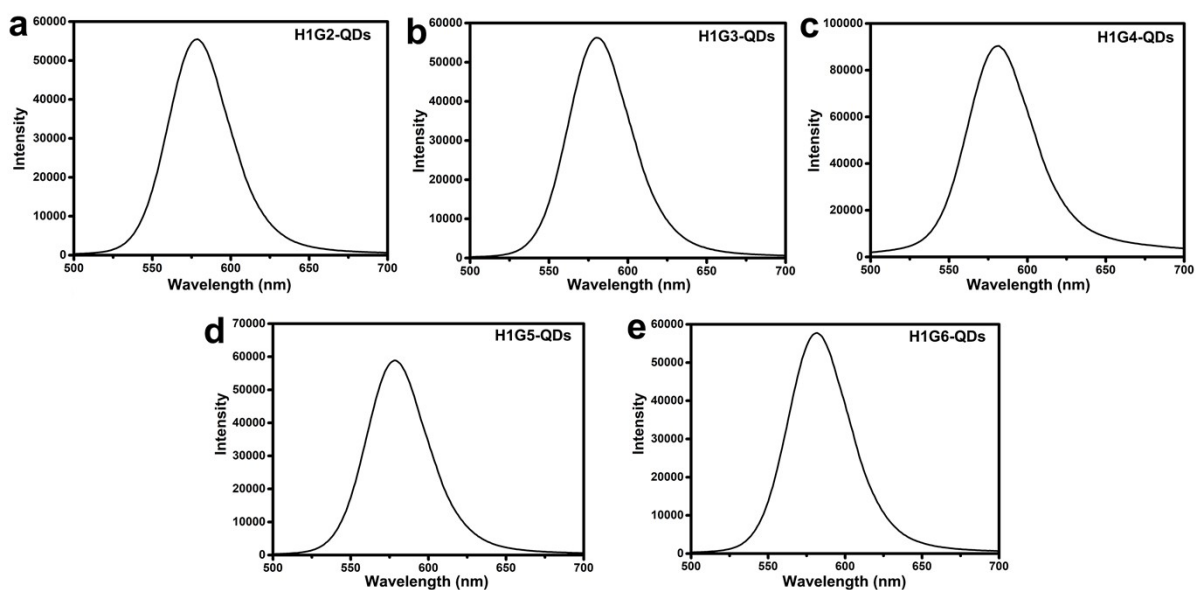

**Fig. S2.** Fluorescence spectra of H1G2-QDs (a), H1G3-QDs (b), H1G4-QDs (c), H1G5-QDs (d) and H1G6-QDs (e).

**Table S1** Physicochemical properties of HGP-QDs.

| Name     | $\lambda_{em}(nm)$ | QY(%) | $\xi$ (mV) |
|----------|--------------------|-------|------------|
| H1G1-QDs | 545                | 22.0  | -30.2      |
|          | 600                | 21.1  | -34.6      |
|          | 655                | 6.80  | -36.9      |
| H1G2-QDs | 535                | 23.0  | -30.9      |
|          | 610                | 28.1  | -33.5      |
| H1G3-QDs | 675                | 8.00  | -36.8      |
|          | 550                | 21.3  | -32.8      |
|          | 620                | 17.9  | -35.2      |
| H1G4-QDs | 675                | 6.25  | -38.1      |
|          | 545                | 21.2  | -32.1      |
|          | 600                | 19.9  | -33.5      |
| H1G5-QDs | 660                | 10.1  | -38.7      |
|          | 525                | 17.4  | -29.2      |
|          | 585                | 21.7  | -34.4      |
| H1G6-QDs | 640                | 13.1  | -36.5      |
|          | 545                | 18.7  | -32.6      |
|          | 595                | 20.1  | -34.6      |
|          | 640                | 15.4  | -37.6      |

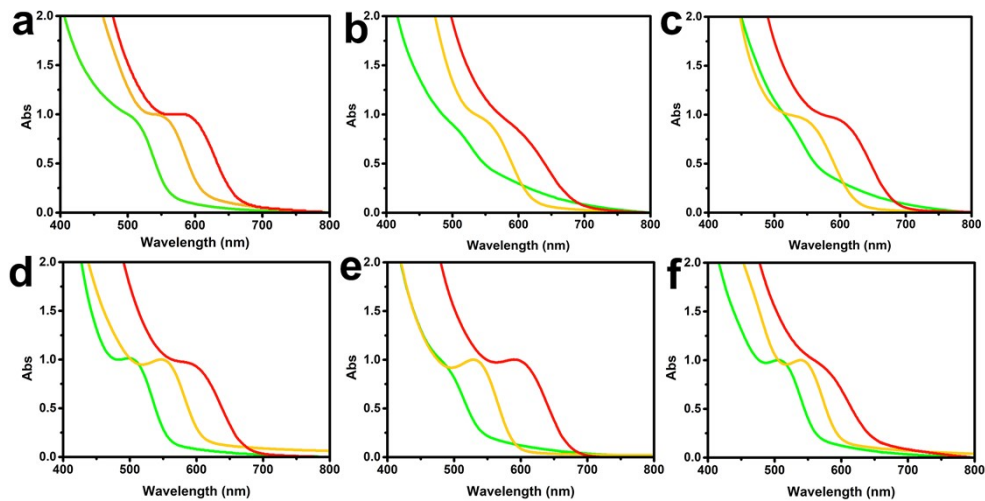

**Fig. S3.** UV-visible spectra of H1G1-QDs (a), H1G2-QDs (b), H1G3-QDs (c), H1G4-QDs (d), H1G5-QDs (e) and H1G6-QDs (f) with three different colors (green, orange, and red).

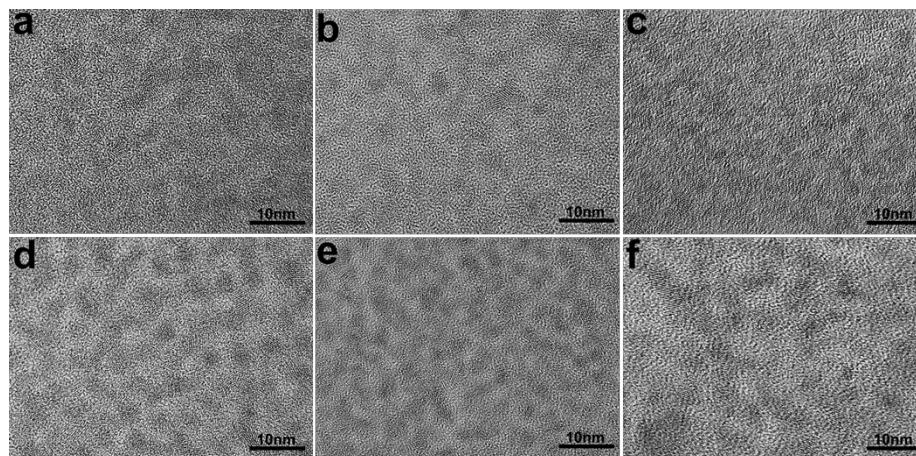

**Fig. S4.** TEM images of green HGP-QDs. H1G1-QDs (a), H1G2-QDs (b), H1G3-QDs (c), H1G4-QDs (d), H1G5-QDs (e), and H1G6-QDs (f).

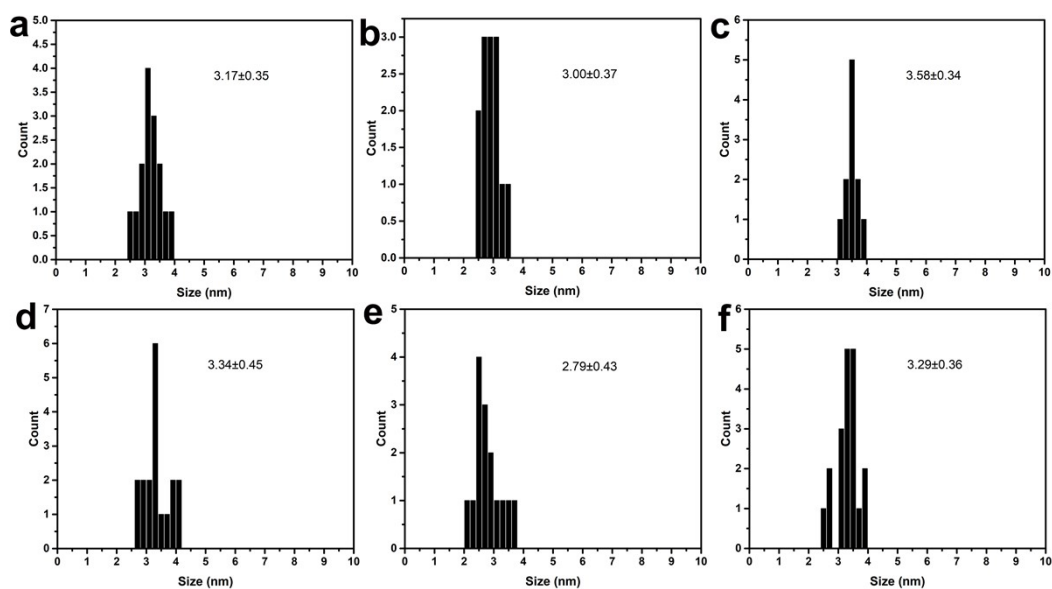

**Fig. S5.** The size distribution of green HGP-QDs. H1G1-QDs (a), H1G2-QDs (b), H1G3-QDs (c), H1G4-QDs (d), H1G5-QDs (e), and H1G6-QDs (f).

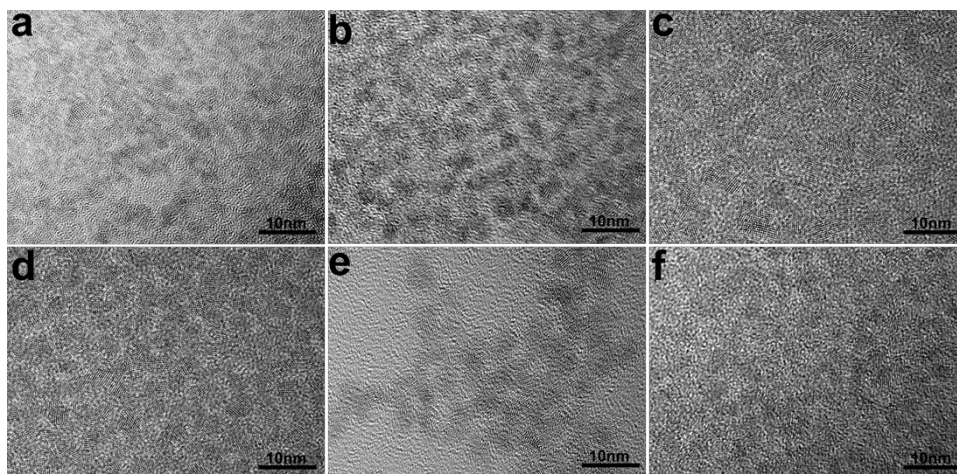

**Fig. S6.** TEM images of orange HGP-QDs. H1G1-QDs (a), H1G2-QDs (b), H1G3-QDs (c), H1G4-QDs (d), H1G5-QDs (e), and H1G6-QDs (f).

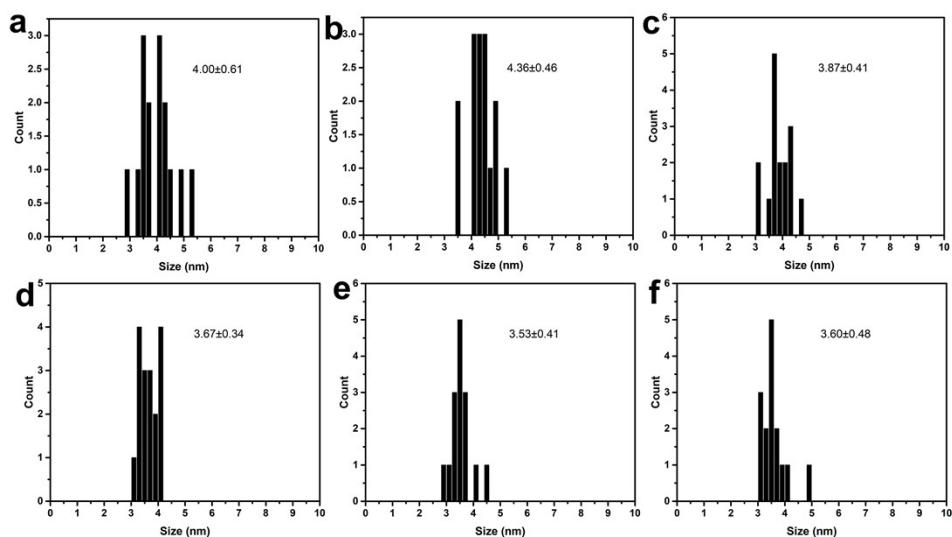

**Fig. S7.** The size distribution of orange HGP-QDs. H1G1-QDs (a), H1G2-QDs (b), H1G3-QDs (c), H1G4-QDs (d), H1G5-QDs (e), and H1G6-QDs (f).

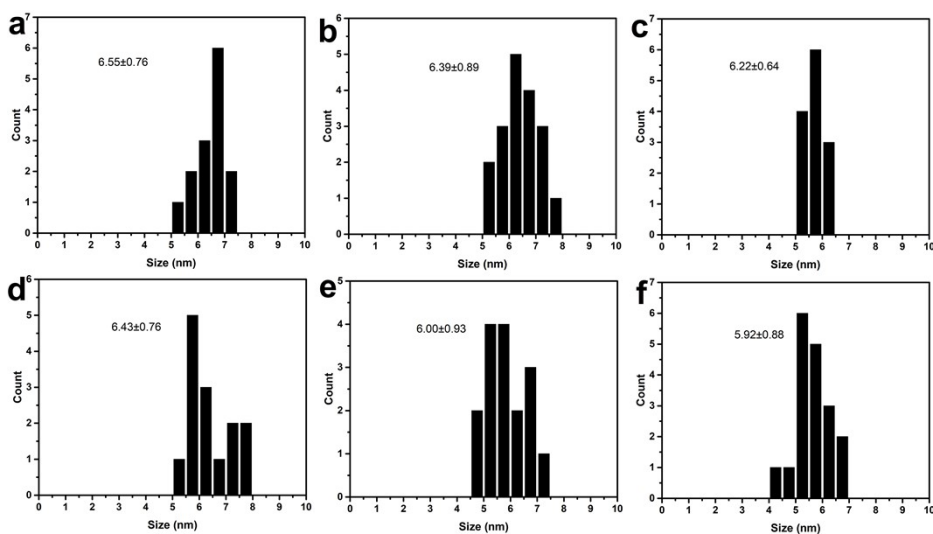

**Fig. S8.** The size distribution of red HGP-QDs. H1G1-QDs (a), H1G2-QDs (b), H1G3-QDs (c), H1G4-QDs (d), H1G5-QDs (e), and H1G6-QDs (f).

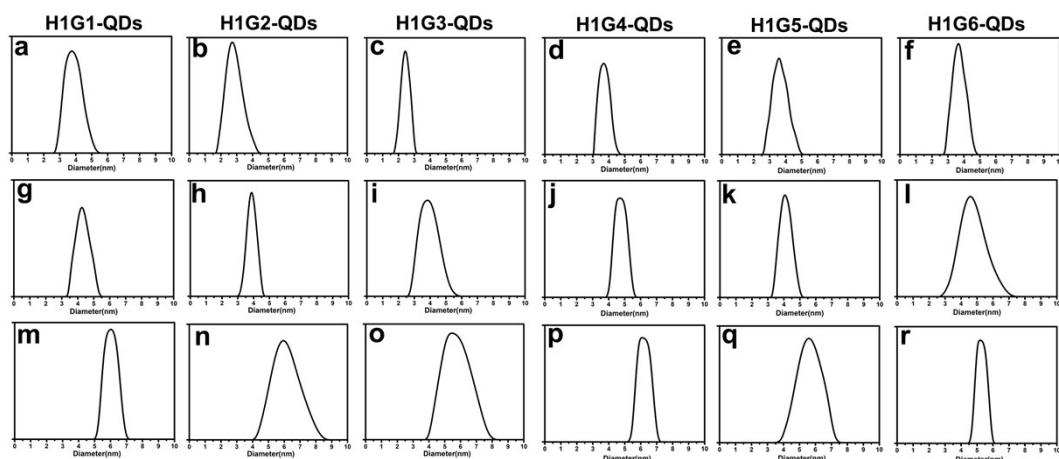

**Fig. S9.** DLS analysis of H1G1-QDs (a, g and m), H1G2-QDs (b, h and n), H1G3-QDs (c, i and o), H1G4-QDs (d, j and p), H1G5-QDs (e, k and q), and H1G6-QDs (f, l and r).

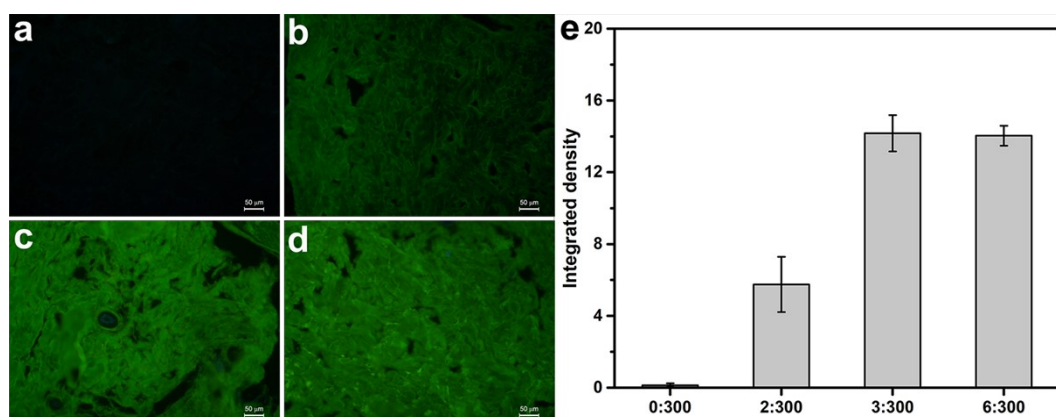

**Fig. S10.** Fluorescence micrographs of skin tissues stained with H1G1-QDs prepared with 0 (a), 0.1 (b), 0.15 (c) and 0.3 mM (d) G1, respectively. The integrated density of tissues stained with H1G1-QDs prepared with G1:H1 ratios of 0:300, 2:300, 3:300 and 6:300, representing G1 concentrations of 0, 0.1, 0.15 and 0.3 mM(e).

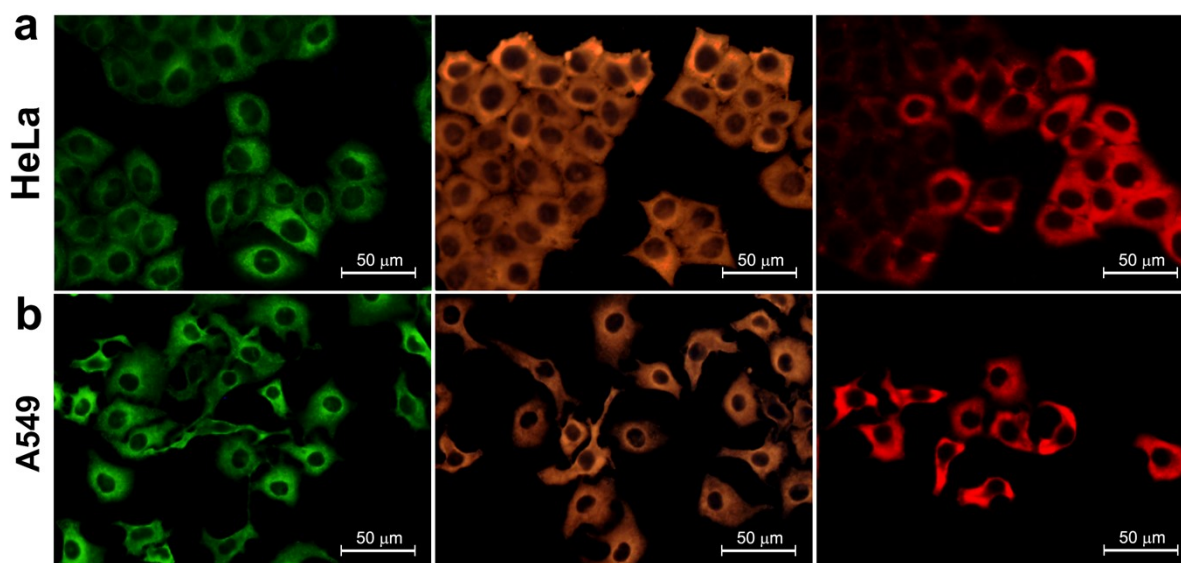

**Fig. S11.** Fluorescence micrographs of fixed HeLa cells (a) and A549 cells (b) stained with multicolor H1G4-QDs (green, orange, and red).

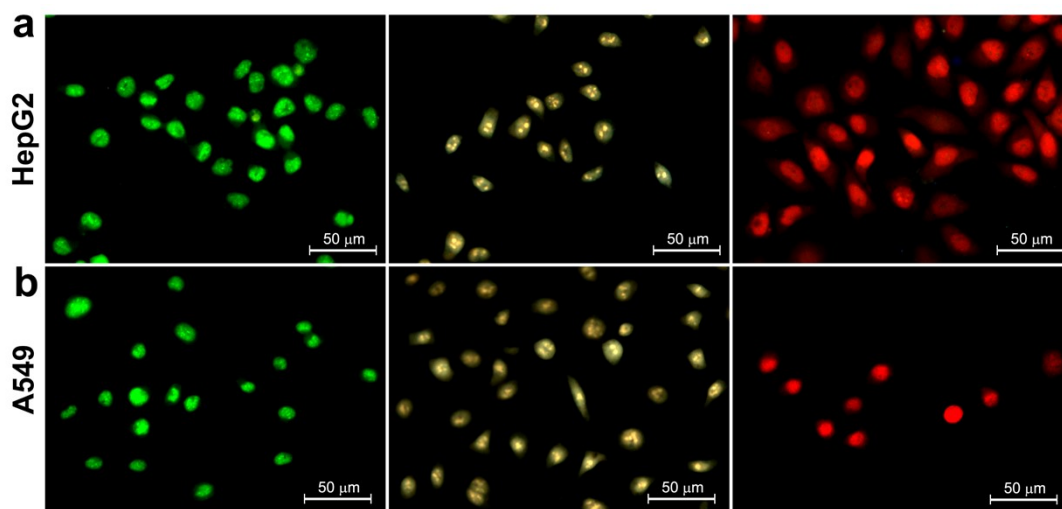

**Fig. S12.** Fluorescence micrographs of fixed HepG2 cells (a) and A549 cells (b) stained with multicolor H1G5-QDs (green, yellow, and red).

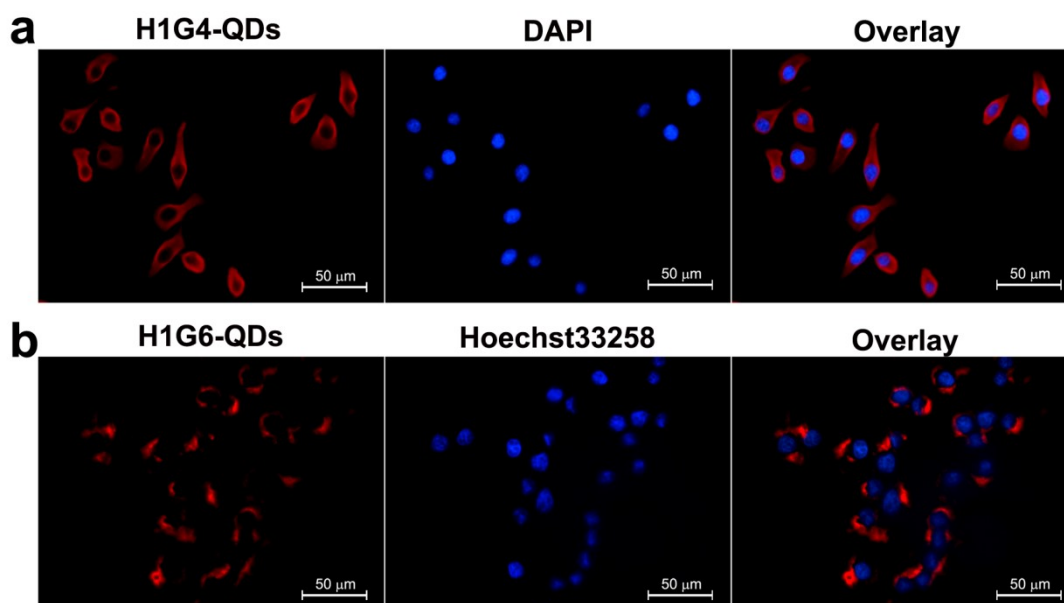

**Fig. S13.** Fluorescence micrographs of HeLa cells stained with H1G4-QDs and DAPI (a), as well as H1G6-QDs and Hoechst 33258 (b).

**Table S2.** Performance of developed methods for the construction of specific QDs probes

| Methods                                      | One-step synthesis | Cells and tissues imaging | Multiplex imaging |
|----------------------------------------------|--------------------|---------------------------|-------------------|
| Pre-synthesis QDs + Crosslink                | No                 | Only cells                | No                |
| Pre-synthesis QDs + Electrostatic adsorption | No                 | Only cells                | No                |
| Pre-synthesis QDs + Assembly                 | No                 | No                        | No                |
| MPA+Protein                                  | Yes                | Only cells                | No                |
| TG+His-tag-PEG                               | Yes                | Only cells                | No                |
| This study                                   | Yes                | Cells and tissues         | Yes               |
